# Supplementary material for: 3D carbon-coated stannous sulfide-molybdenum disulfide anodes for advanced lithium-ion batteries
Source: Royal Society of Chemistry journal article supplement (doi:10.1039/d0ma00493f), 2020-01-01
Supplement: d0ma00493f2.pdf [file d0ma00493f2.pdf]

## Supporting Information

### 3D carbon-coated stannous sulfide-molybdenum disulfide composite as anode for high-performance lithium-ion batteries

Yuanyi Luo<sup>a#</sup>, Chunxia Chen<sup>a#</sup>, Weicheng Sun<sup>a</sup>, Ludi Shi<sup>a</sup>, Yemao Lin<sup>a</sup>, Guangtao Cong<sup>\*a</sup>, Jiali Yu<sup>a</sup>, Caizhen Zhu<sup>\*a</sup>, Jian Xu<sup>a</sup>

<sup>a</sup>Institute of Low-dimensional Materials Genome Initiative, College of Chemistry and Environmental Engineering, Shenzhen University, Shenzhen, Guangdong, 518060, P. R. China.

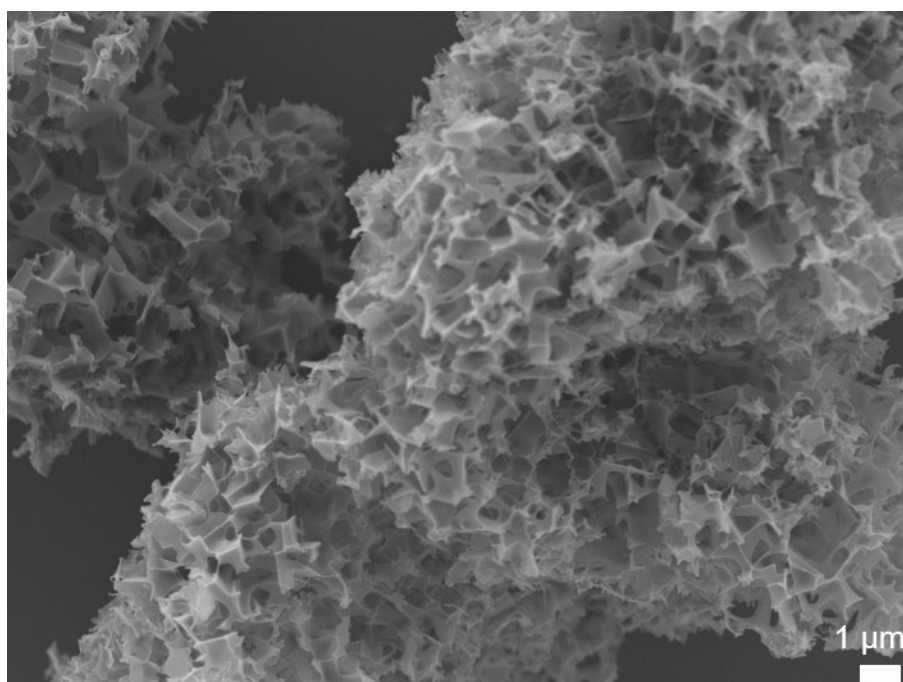

**Fig. S1.** FESEM images of the as-prepared 3D SnS @C.

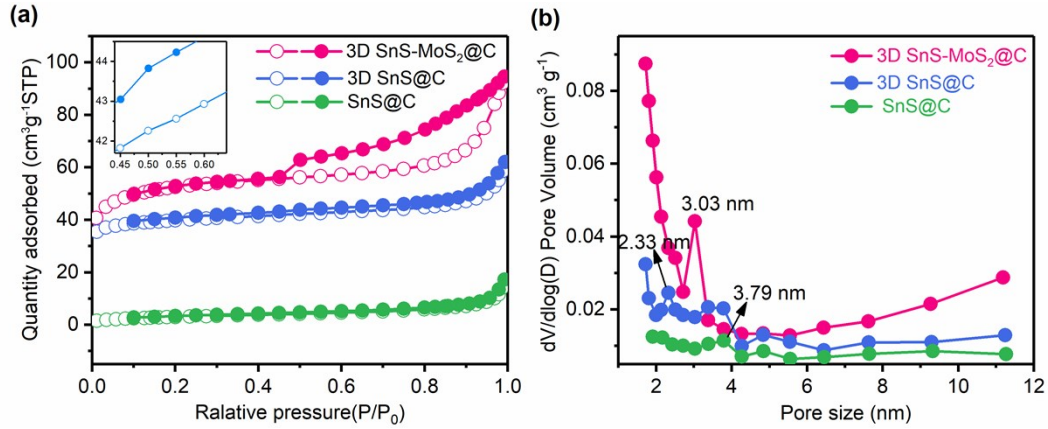

**Fig. S2.** The nitrogen adsorption/desorption isotherm plots (a) and pore size distribution (b) of 3D SnS-MoS<sub>2</sub>@C, 3D SnS@C, and SnS@C. The nitrogen adsorption/desorption isotherm plot of 3D SnS@C also exhibits a minor hysteresis loop, and inset shows the enlarged area of the ending parts of the hysteresis loop of 3D SnS@C. The discrepancy in the nitrogen adsorption/desorption isotherm plots of 3D SnS-MoS<sub>2</sub>@C, 3D SnS@C might be ascribed to the difference in their chemical compositions and fine structures of pore boundaries.

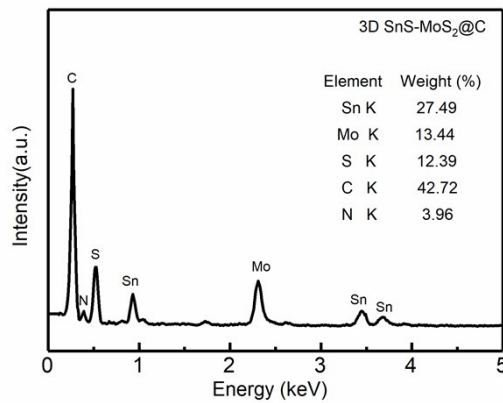

**Fig. S3.** EDS analysis of the elemental composition of 3D SnS-MoS<sub>2</sub>@C.

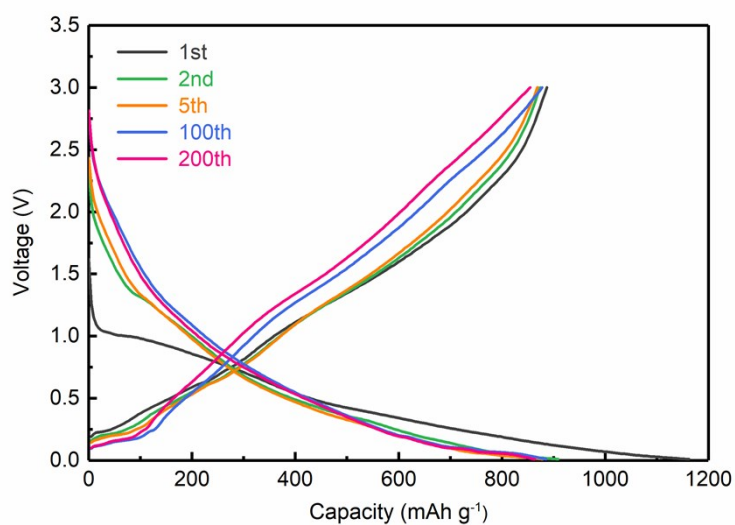

**Fig. S4.** Charge/discharge curves of 3D SnS-MoS<sub>2</sub>@C cycling in the voltage range of 0.01–3.0 V at a current density of 200 mA g<sup>-1</sup>.

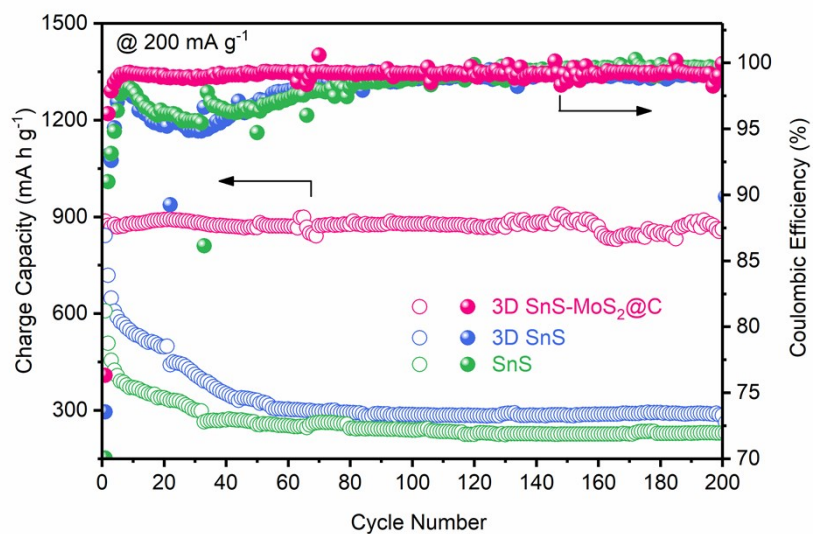

**Fig. S5.** Cycling performances of 3D SnS-MoS<sub>2</sub>@C, 3D SnS@C and SnS@C composite at 200 mA g<sup>-1</sup> for the first 200 cycles.

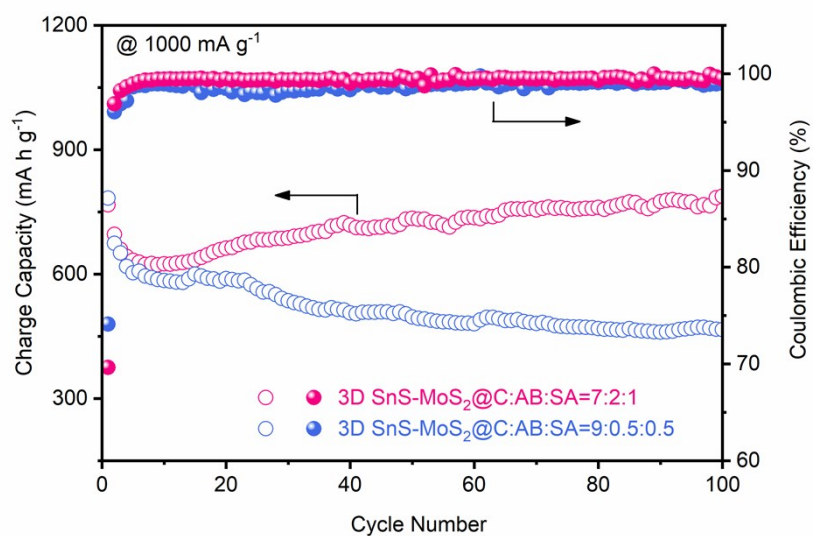

**Fig. S6.** Galvanostatic cycling of the 3D SnS-MoS<sub>2</sub>@C electrodes with 70 wt% and 90 wt% weight ratio of 3D SnS-MoS<sub>2</sub>@C.

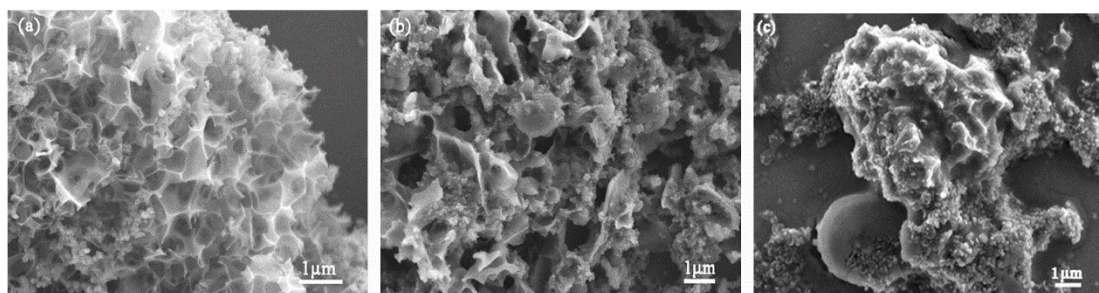

**Fig. S7.** FESEM images of the 3D SnS-MoS<sub>2</sub>@C (a), 3D SnS@C (b) and SnS@C (c) electrodes after 50 cycles at 1000 mA g<sup>-1</sup>.

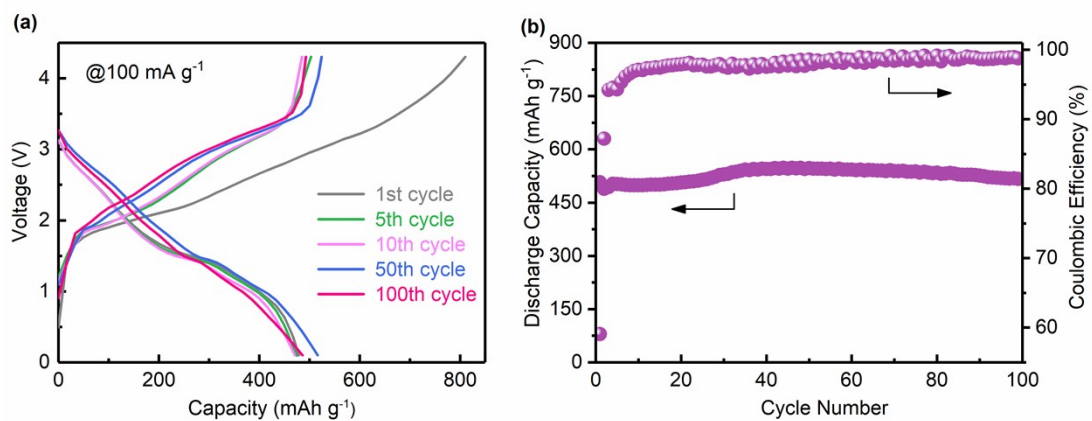

**Fig. S8.** Voltage profiles (a) and corresponding discharge capacities/CEs (b) of the galvanostatic cycling tests of the full cell with 3D SnS-MoS<sub>2</sub>@C anode and LiFePO<sub>4</sub> cathode at 100 mA g<sup>-1</sup>.

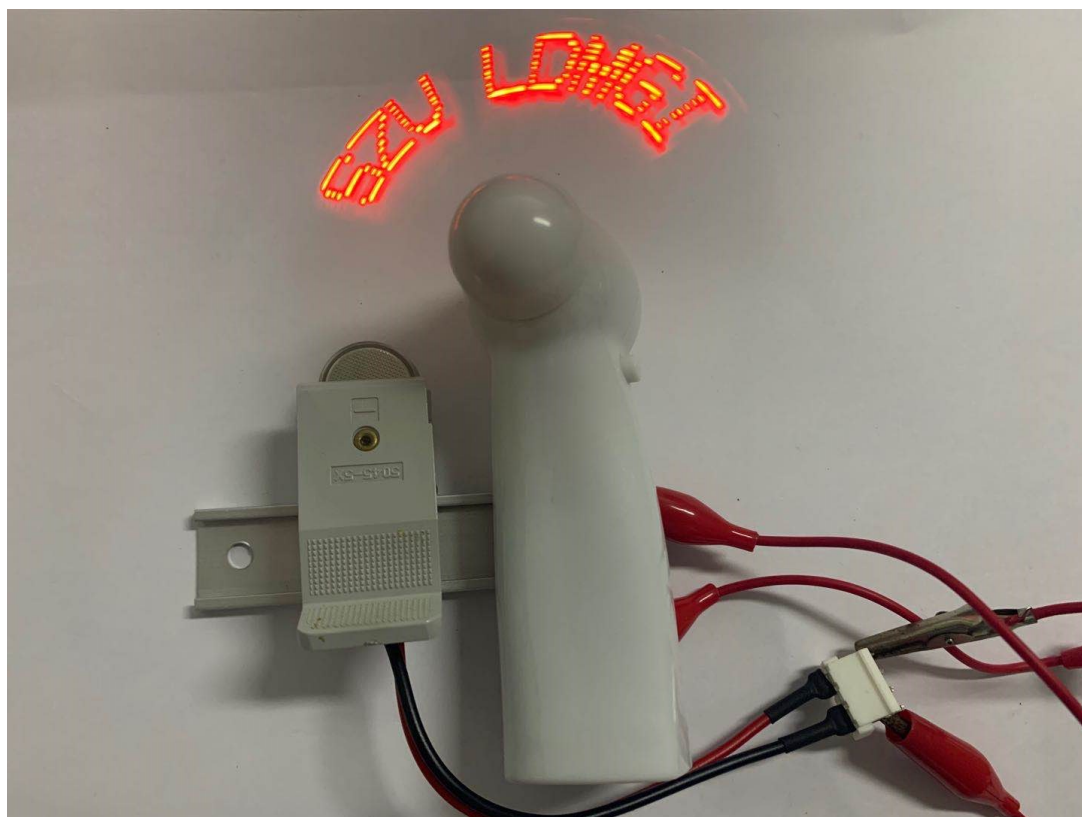

**Fig. S9.** Digital photo of the LED fan powered by three 3D SnS-MoS<sub>2</sub>/LiFePO<sub>4</sub> full cells connected in series.

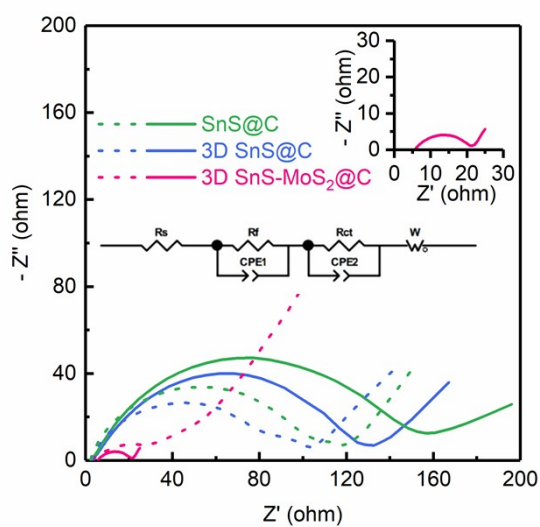

**Fig. S10.** Nyquist plots of the 3D SnS-MoS<sub>2</sub>@C, 3D SnS@C, and SnS@C electrodes after 50 cycles at a current density of 100 mA g<sup>-1</sup>. Dotted lines and solid lines represent the Nyquist plots of each electrode before cycling and after 50 cycles respectively.

**Table 1.** EIS fitting of 3D SnS-MoS<sub>2</sub>@C, 3D SnS@C, and SnS@C electrodes after 50 cycles.

| Sample after 50 cycles     | R <sub>s</sub> (Ω) | R <sub>f</sub> (Ω) | R <sub>ct</sub> (Ω) | W(Ω)  |
|----------------------------|--------------------|--------------------|---------------------|-------|
| 3D SnS-MoS <sub>2</sub> @C | 5.819              | 0.717              | 13.7                | 4.29  |
| 3D SnS@C                   | 3.615              | 19.74              | 97.26               | 27.08 |
| SnS@C                      | 3.013              | 41.67              | 119.5               | 299.9 |
